# Supplementary material
Source: Royal Society of Chemistry journal article supplement (doi:10.1039/d6bm00269b)
Supplement: d6bm00269b1.pdf [file d6bm00269b1.pdf]

## *Supporting Information*

### **A Sulfonated Diblock Copolymer Exhibits Reversible Antiplatelet Activity and Enables Aqueous Dipyridamole Formulation**

Aleksandra Frackiewicz<sup>\*a</sup>, Karol Depczynski<sup>a</sup>, Magdalena Obłozza<sup>b</sup>, Shin-ichi Yusa<sup>c</sup>, Amarjargal Altangerel<sup>d</sup>, Amir Fahmi<sup>d</sup>, Dariusz Pawlak<sup>a</sup>, Krzysztof Szczubińska<sup>b</sup>, Andrzej Mogielnicki<sup>a</sup> and Bartłomiej Kalaska<sup>\*\*a</sup>

<sup>a</sup> Department of Pharmacodynamics, Medical University of Białystok, Mickiewicza 2C St., 15-089 Białystok, Poland. E-mail: \*aleksandra.frackiewicz@umb.edu.pl, \*\*bartlomiej.kalaska@umb.edu.pl

<sup>b</sup> Faculty of Chemistry, Jagiellonian University, Gronostajowa 2 St., 30-387 Krakow, Poland

<sup>c</sup> Department of Applied Chemistry, Graduate School of Engineering, University of Hyogo, 167 Shosha, Himeji 671-2280, Japan

<sup>d</sup> Faculty of Technology and Bionics, Rhine-Waal University of Applied Sciences, Marie-Curie-Str. 1, 47533 Kleve, Germany

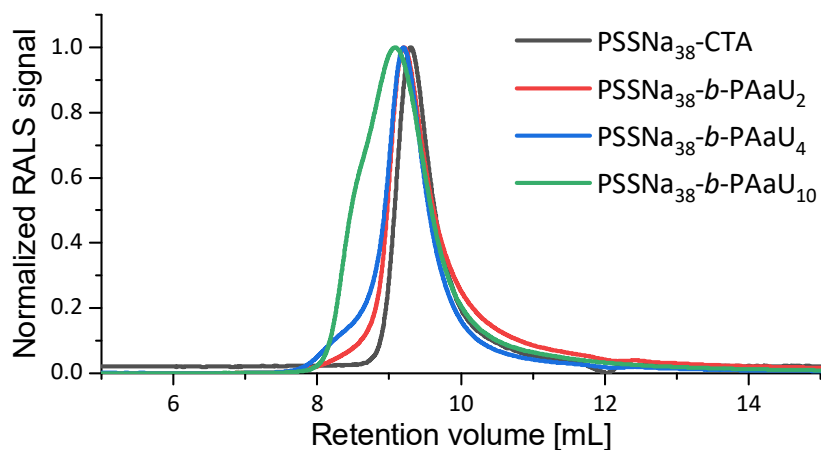

**Figure S1.** GPC chromatograms of PSSNa<sub>38</sub>-*b*-PAAU<sub>n</sub> copolymers measured at a 0.8 ml/min flow rate. A 0.1 M NaNO<sub>3</sub> aqueous solution containing 20% v/v acetonitrile was used as eluent.

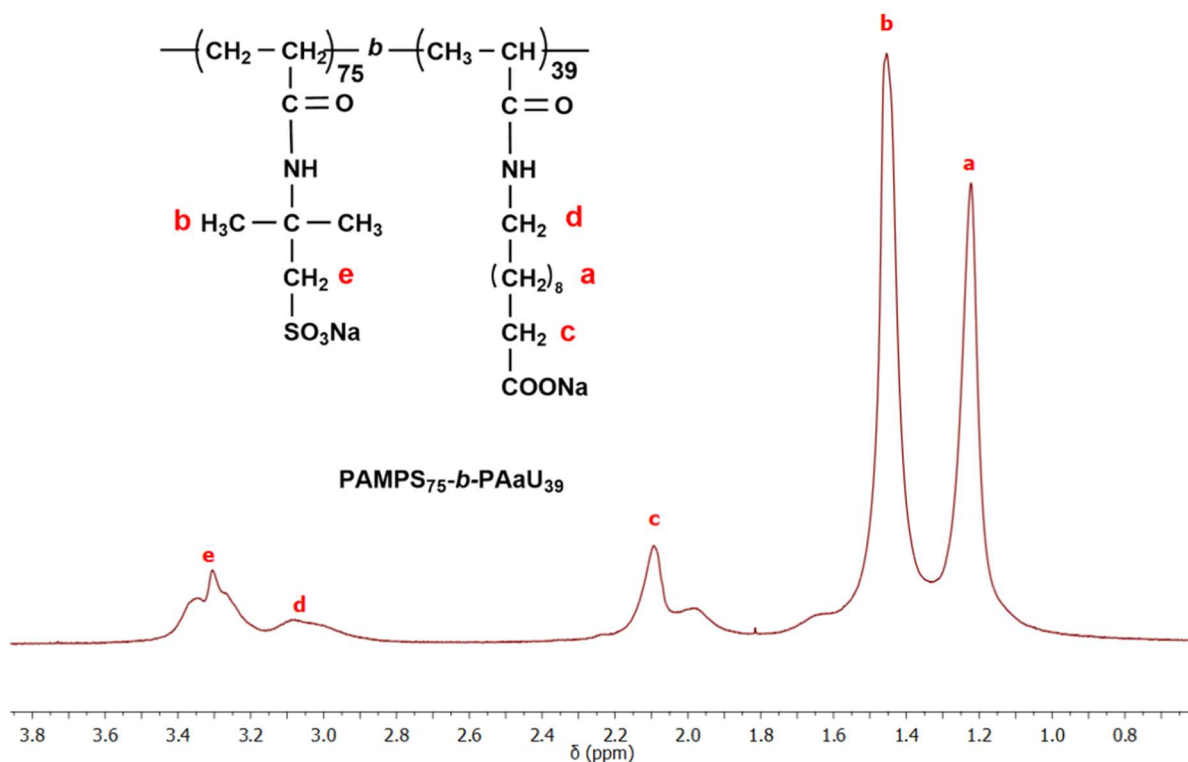

**Figure S2.** <sup>1</sup>H NMR spectrum for PAMPS<sub>75</sub>-*b*-PAAU<sub>39</sub> at  $C_p = 10$  g/L in D<sub>2</sub>O at pH 10. DP<sub>n</sub> of the PAAU block was estimated by comparing the intensities of signals *c* and *b*.

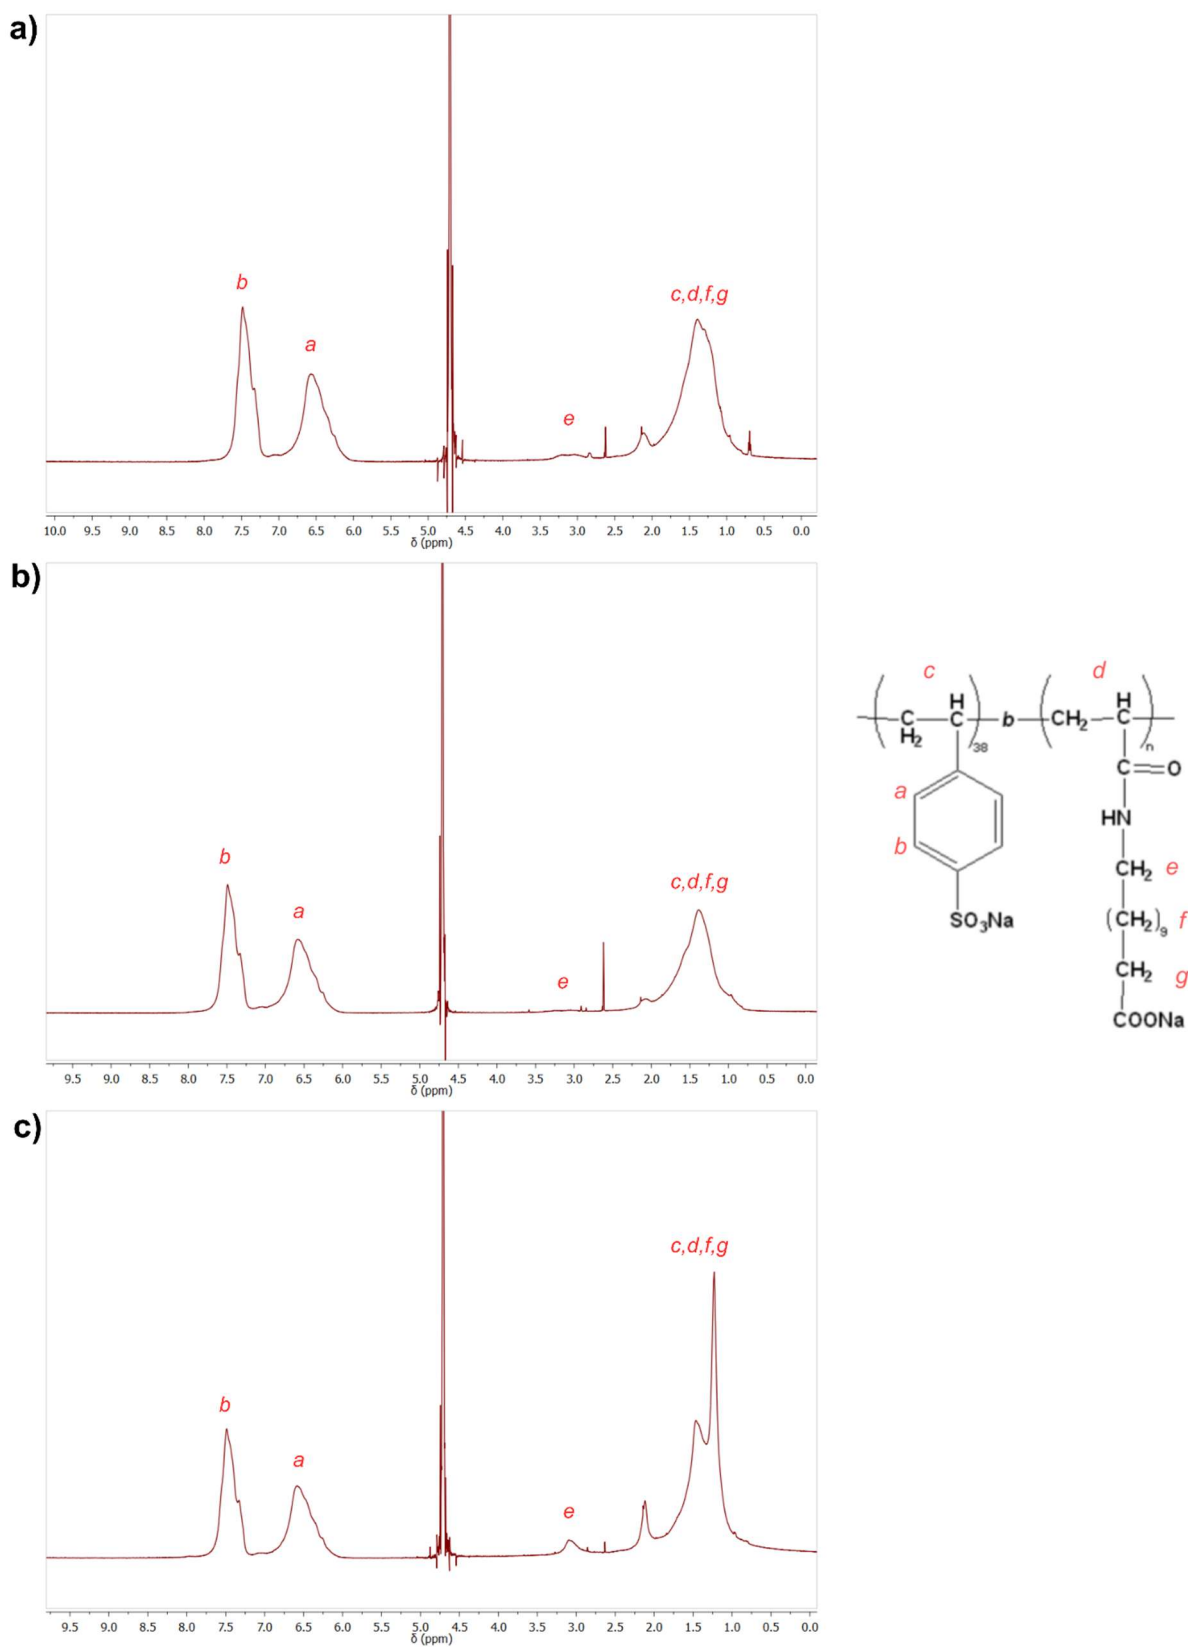

**Figure S3.**  $^1\text{H}$  NMR spectra of PSSNa<sub>38</sub>-*b*-PAaU<sub>2</sub> (a), PSSNa<sub>38</sub>-*b*-PAaU<sub>4</sub> (b), and PSSNa<sub>38</sub>-*b*-PAaU<sub>10</sub> (c) in D<sub>2</sub>O.

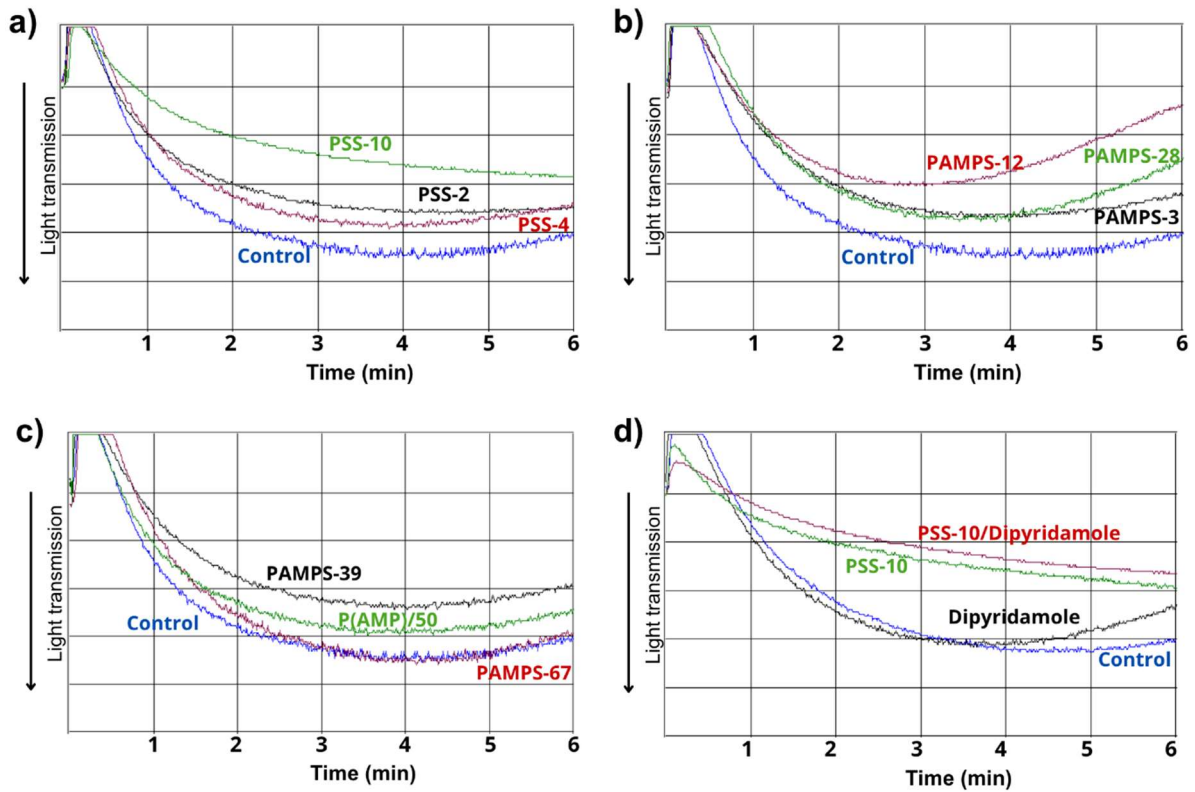

**Figure S4.** Representative raw aggregation tracings of **a)** PSSNa<sub>38</sub>-*b*-PAaU<sub>2</sub> (PSS-2; 100 µg/mL), PSSNa<sub>38</sub>-*b*-PAaU<sub>4</sub> (PSS-4; 100 µg/mL), PSSNa<sub>38</sub>-*b*-PAaU<sub>10</sub> (PSS-10; 100 µg/mL), **b)** PAMPS<sub>75</sub>-*b*-PAaU<sub>3</sub> (PAMPS-3; 100 µg/mL), PAMPS<sub>75</sub>-*b*-PAaU<sub>12</sub> (PAMPS-12; 100 µg/mL), PAMPS<sub>75</sub>-*b*-PAaU<sub>39</sub> (PAMPS-39; 100 µg/mL), **c)** PAMPS<sub>75</sub>-*b*-PAaU<sub>67</sub> (PAMPS-67; 100 µg/mL), P(AMPS<sub>50</sub>-*ran*-AaU<sub>50</sub>) (P(AMP)/50; 100 µg/mL), and **d)** dipyridamole (10 µg/mL), PSSNa<sub>38</sub>-*b*-PAaU<sub>10</sub> (PSS-10; 190 µg/mL), and PSSNa<sub>38</sub>-*b*-PAaU<sub>10</sub>/dipyridamole system (PSS-10/D; 200 µg/mL) recorded by the Chronolog aggregometer in PRP.

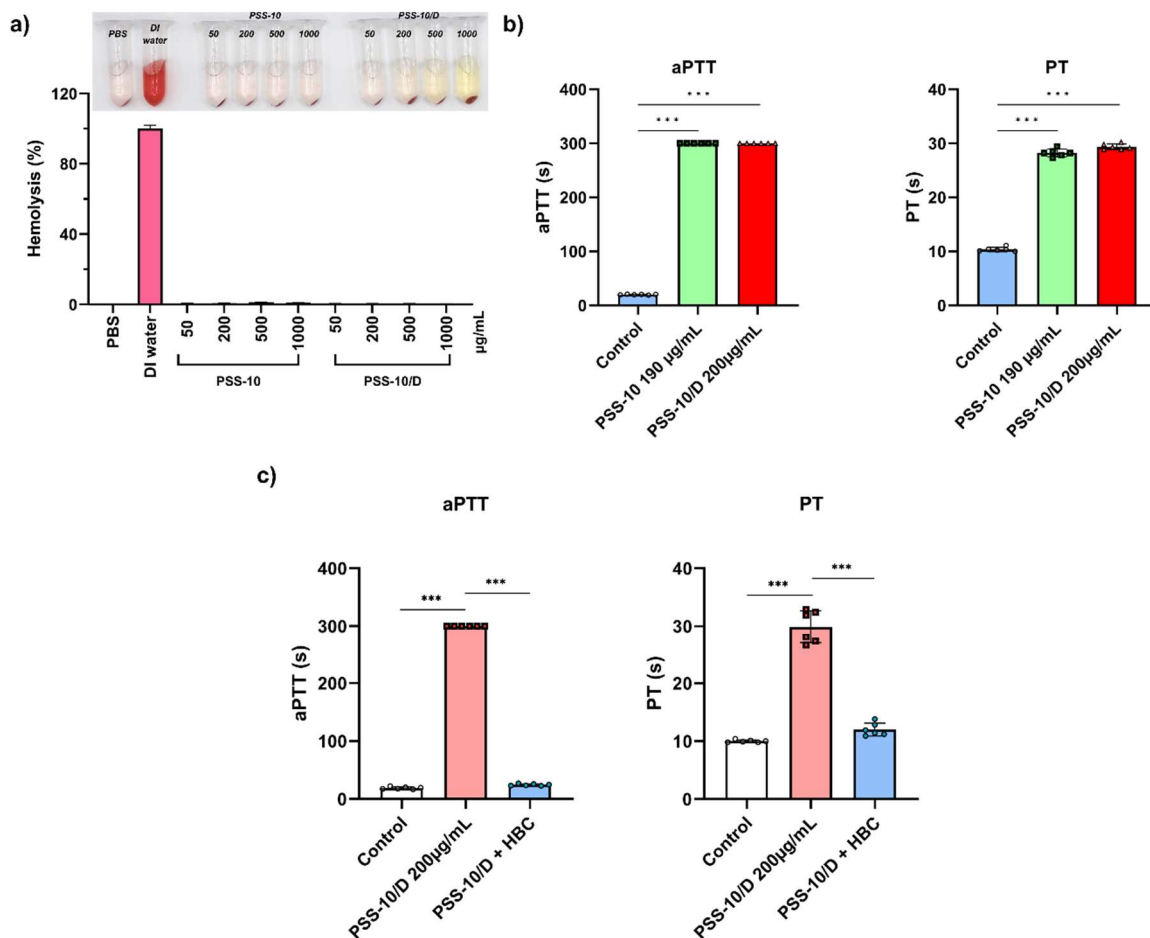

**Figure S5. Hemocompatibility, activated partial thromboplastin time (aPTT) and prothrombin time (PT)-based assessment of anticoagulant activity, and heparin-binding copolymer (HBC)-mediated reversal of the anticoagulant effect of the PSSNa<sub>38</sub>-b-PAaU<sub>10</sub>/dipyridamole system (PSS-10/D) *in vitro*.** **a)** Effect of PSSNa<sub>38</sub>-b-PAaU<sub>10</sub> (PSS-10) and PSS-10/D on the mean percentage of total hemolysis *in vitro* in rat blood, compared to the negative control (PBS) and the positive control (deionized (DI) water). The image shows no hemolytic effect induced by the polymer or the polymer-dipyridamole system at the tested concentrations. **b)** Effects of the PSS-10 (190 µg/mL) and PSS-10/D (200 µg/mL) on plasma coagulation parameters, including aPTT and PT (n = 6). **c)** Reversal of the anticoagulant effect of PSS-10/D by complexation with HBC, assessed by aPTT and PT in plasma (n = 6). Data are presented as mean ± SD; individual points represent independent measurements. \*\*\*p < 0.001.

**Table S1.** Reaction mixture composition for the synthesis of PSSNa<sub>38</sub>-*b*-PAaU<sub>n</sub> polymers.

| Samples                                            | Concentration |                     |             |
|----------------------------------------------------|---------------|---------------------|-------------|
|                                                    | [AaU] (M)     | [PSSNa-CTA]<br>(mM) | [ACVA] (mM) |
| PSSNa <sub>38</sub> - <i>b</i> -PAaU <sub>2</sub>  | 0.5           | 92.0                | 5.0         |
| PSSNa <sub>38</sub> - <i>b</i> -PAaU <sub>4</sub>  | 0.5           | 46.0                | 1.5         |
| PSSNa <sub>38</sub> - <i>b</i> -PAaU <sub>10</sub> | 0.5           | 23.0                | 1.0         |

**Table S2.** Number- and weight-average molecular weight ( $M_n$  and  $M_w$ ), dispersion index ( $M_w/M_n$ ) of PSSNa<sub>38</sub> - CTA (macro-CTA) and PSSNa<sub>38</sub>-*b*-PAaU<sub>n</sub> copolymers, and the number-average degree of polymerization ( $DP_n$ ) of the PAaU blocks.

| Polymer                                            | $M_n$ ( $\cdot 10^4$ )<br>(GPC) | $M_w$ ( $\cdot 10^4$ )<br>(GPC) | $M_w/M_n$ | $DP_n$<br>(PAaU,<br>NMR) | $DP_n$<br>(PAaU,<br>EA) |
|----------------------------------------------------|---------------------------------|---------------------------------|-----------|--------------------------|-------------------------|
| PSSNa <sub>38</sub> -CTA                           | 0.81                            | 0.95                            | 1.17      | -                        | -                       |
| PSSNa <sub>38</sub> - <i>b</i> -PAaU <sub>2</sub>  | 0.92                            | 1.16                            | 1.27      | 2                        | 2                       |
| PSSNa <sub>38</sub> - <i>b</i> -PAaU <sub>4</sub>  | 1.53                            | 1.91                            | 1.25      | 4                        | 4                       |
| PSSNa <sub>38</sub> - <i>b</i> -PAaU <sub>10</sub> | 1.95                            | 2.62                            | 1.34      | 10                       | 10                      |

**Table S3.** Molecular weight and compositions of the PAMPS<sub>75</sub>-*b*-PAaU<sub>m</sub> and P(AMPS<sub>50</sub>-*ran*-AaU<sub>50</sub>) polymers.

| Polymer                                                | $M_n^a$ ( $\cdot 10^4$ )<br>(NMR) | $M_w^b$ ( $\cdot 10^4$ )<br>(GPC) | $M_w/M_n$         | DP <sub>n</sub><br>(PAMPS,<br>GPC) <sup>c</sup> | DP <sub>n</sub><br>(PAaU,<br>NMR) <sup>d</sup> |
|--------------------------------------------------------|-----------------------------------|-----------------------------------|-------------------|-------------------------------------------------|------------------------------------------------|
| PAMPS <sub>75</sub> - <i>b</i> -PAaU <sub>12</sub>     | 1.98                              | 4.53                              | 1.42              | 75                                              | 12                                             |
| PAMPS <sub>75</sub> - <i>b</i> -PAaU <sub>39</sub>     | 2.73                              | 9.36                              | 1.23              | 75                                              | 39                                             |
| PAMPS <sub>75</sub> - <i>b</i> -PAaU <sub>67</sub>     | 3.51                              | 2.93                              | 1.40              | 75                                              | 67                                             |
| P(AMPS <sub>50</sub> - <i>ran</i> -AaU <sub>50</sub> ) | 4.38 <sup>b</sup>                 | 9.90 <sup>e</sup>                 | 2.26 <sup>e</sup> | 50 <sup>f</sup>                                 | 50 <sup>f</sup>                                |

<sup>a</sup> Determined by <sup>1</sup>H NMR.

<sup>b</sup> Determined by GPC in H<sub>2</sub>O/CH<sub>3</sub>CN (80/20, v/v) 0.1 M NaNO<sub>3</sub> solution calibrated with poly (sodium 4-styrenesulfonate) standards.

<sup>c</sup> Number-average degree of polymerization of the PAMPS blocks determined by GPC in H<sub>2</sub>O/CH<sub>3</sub>CN (80/20, v/v) 0.1 M NaNO<sub>3</sub> solution calibrated with poly (sodium styrene sulfonate) standards.

<sup>d</sup> Number-average degree of polymerization of the PAaU blocks determined by <sup>1</sup>H NMR in D<sub>2</sub>O.

<sup>e</sup> Determined by GPC using a mixed solvent of water and DMF (50/50, v/v) containing 50 mM LiBr as the eluent.

<sup>f</sup> % mol, determined by <sup>1</sup>H NMR in D<sub>2</sub>O at 95°C.

**Table S4.** The values of hydrodynamic diameter (d), and zeta potentials for PSSNa<sub>38</sub>-*b*-PAaU<sub>n</sub>, PAMPS<sub>75</sub>-*b*-PAaU<sub>m</sub>, and P(AMPS<sub>50</sub>-*ran*-AaU<sub>50</sub>) copolymers (c = 1 mg/ml in PBS, pH 7.4, T = 25°C).

|   | <b>Copolymer</b>                                       | <b>d [nm]</b> | <b>PDI</b> | <b>Zeta potential</b> |
|---|--------------------------------------------------------|---------------|------------|-----------------------|
| 1 | PSSNa <sub>38</sub> - <i>b</i> -PAaU <sub>2</sub>      | 5.88±0.17     | 0.41±0.13  | -29.4±1.8             |
| 2 | PSSNa <sub>38</sub> - <i>b</i> -PAaU <sub>4</sub>      | 5.96±0.20     | 0.41±0.45  | -31.6±3.4             |
| 3 | PSSNa <sub>38</sub> - <i>b</i> -PAaU <sub>10</sub>     | 13.02±1.13    | 0.28±0.01  | -27.5±2.9             |
| 4 | PAMPS <sub>75</sub> - <i>b</i> -PAaU <sub>12</sub>     | 7.38±0.82     | 0.37±0.12  | -24.3±2.2             |
| 5 | PAMPS <sub>75</sub> - <i>b</i> -PAaU <sub>39</sub>     | 23.2±0.5      | 0.32±0.06  | -25.7±0.8             |
| 6 | PAMPS <sub>75</sub> - <i>b</i> -PAaU <sub>67</sub>     | 19.9±1.1      | 0.23±0.01  | -33.3±2.1             |
| 7 | P(AMPS <sub>50</sub> - <i>ran</i> -AaU <sub>50</sub> ) | 16.0±2.6      | 0.38±0.07  | -24.2±1.2             |
